# Supplementary material
Source: Research Square preprint supplement (doi:10.21203/rs.3.rs-9511063/v1)
Supplement: Supplementary file 1 [file 79b1aa18aa65f1e92d0615df.docx]

Supplementary Materials

Paper Mill Subtypes in Medical AI: Multi-Signal NLP Detection Reveals Heterogeneous Fraud Fingerprints

# Supplementary Table 1. Retraction Watch Reason Codes

Showing the 30 most frequent reason codes among 2,872 filtered medical AI retractions. Percentages exceed 100% because papers may have multiple reasons.

| Reason | Count | % |
| --- | --- | --- |
| Investigation by Journal/Publisher | 2766 | 96.3% |
| Unreliable Results and/or Conclusions | 2724 | 94.8% |
| Concerns/Issues about Referencing/Attributions | 2146 | 74.7% |
| Investigation by Third Party | 2115 | 73.6% |
| Concerns/Issues about Peer Review | 1828 | 63.6% |
| Paper Mill | 1643 | 57.2% |
| Concerns/Issues about Data | 1637 | 57.0% |
| Computer-Aided Content or Computer-Generated Content | 1491 | 51.9% |
| Concerns/Issues about Results and/or Conclusions | 1415 | 49.3% |
| Compromised Peer Review | 1065 | 37.1% |
| Rogue Editor | 340 | 11.8% |
| Lack of IRB/IACUC Approval and/or Compliance | 242 | 8.4% |
| Concerns/Issues about Third Party Involvement | 236 | 8.2% |
| Informed/Patient Consent - None/Withdrawn | 214 | 7.5% |
| Author Unresponsive | 186 | 6.5% |
| Concerns/Issues about Article | 148 | 5.2% |
| Objections by Author(s) | 143 | 5.0% |
| Concerns/Issues about Authorship/Affiliation | 93 | 3.2% |
| Concerns/Issues about Human Subject Welfare | 39 | 1.4% |
| Date of Article and/or Notice Unknown | 33 | 1.1% |
| Upgrade/Update of Prior Notice(s) | 27 | 0.9% |
| Removed | 25 | 0.9% |
| Notice - Limited or No Information | 21 | 0.7% |
| Unreliable Data | 17 | 0.6% |
| Withdrawn to Publish in Different Journal | 14 | 0.5% |
| Euphemisms for Duplication | 11 | 0.4% |
| Euphemisms for Plagiarism | 10 | 0.3% |
| Plagiarism of/in Article | 9 | 0.3% |
| Concerns/Issues about Image | 9 | 0.3% |
| Duplication of/in Article | 9 | 0.3% |

# Supplementary Table 2. Complete Feature List

40 features across 7 categories. Importance = mean of Random Forest and XGBoost feature importances.

| Feature | Category | Description | Mean | Importance |
| --- | --- | --- | --- | --- |
| tortured_phrase_count | Tortured phrases | Count of tortured phrases detected in abstract | 0.000 | 0.0000 |
| tortured_phrase_density | Tortured phrases | Tortured phrases per 1,000 words | 0.003 | 0.0000 |
| tortured_unique_count | Tortured phrases | Unique tortured phrase types detected | 0.000 | 0.0000 |
| abstract_template_score | Structural formulaic | How closely abstract follows template pattern (0-1 | 0.296 | 0.0239 |
| boilerplate_sentence_count | Structural formulaic | Count of formulaic boilerplate sentences | 0.181 | 0.0000 |
| boilerplate_density | Structural formulaic | Boilerplate sentences per 1,000 words | 0.911 | 0.0000 |
| sentence_length_cv | Structural formulaic | Coefficient of variation of sentence lengths | 0.322 | 0.0237 |
| paragraph_length_cv | Structural formulaic | Coefficient of variation of paragraph lengths | 0.000 | 0.0000 |
| vocabulary_diversity | Structural formulaic | Type-token ratio of abstract text | 0.662 | 0.1628 |
| ai_vocabulary_diversity | AI text markers | Type-token ratio (first 1,000 tokens) | 0.619 | 0.0694 |
| ai_hapax_ratio | AI text markers | Fraction of words appearing exactly once | 0.740 | 0.0405 |
| ai_sentence_uniformity | AI text markers | 1 - CV of sentence lengths (higher = more uniform) | 0.601 | 0.0266 |
| ai_mean_sentence_length | AI text markers | Mean words per sentence | 22.675 | 0.0240 |
| ai_discourse_marker_density | AI text markers | Discourse markers per 1,000 words | 2.489 | 0.0173 |
| ai_llm_phrase_count | AI text markers | Count of LLM-characteristic phrases | 0.038 | 0.0000 |
| ai_llm_phrase_density | AI text markers | LLM phrases per 1,000 words | 0.184 | 0.0000 |
| ai_avg_word_length | AI text markers | Mean word length in characters | 5.780 | 0.0681 |
| ai_long_word_ratio | AI text markers | Fraction of words > 10 characters | 0.086 | 0.0382 |
| author_count | Bibliometric | Number of authors on the paper | 6.188 | 0.0584 |
| country_count | Bibliometric | Number of unique author countries | 1.548 | 0.0263 |
| reference_count | Bibliometric | Number of referenced works | 35.551 | 0.1540 |
| sim_max | Cross-document simil | Maximum TF-IDF cosine similarity to any other corp | 0.270 | 0.0246 |
| sim_mean | Cross-document simil | Mean cosine similarity to all other corpus papers | 0.041 | 0.0323 |
| sim_n_high | Cross-document simil | Papers with similarity > 0.85 | 0.022 | 0.0000 |
| sim_n_moderate | Cross-document simil | Papers with similarity > 0.65 | 0.035 | 0.0000 |
| net_author_reuse_rate | Co-authorship networ | Fraction of authors on > 1 corpus paper | 0.112 | 0.0318 |
| net_max_author_papers | Co-authorship networ | Most prolific author’s corpus paper count | 1.597 | 0.0199 |
| net_coauthor_density | Co-authorship networ | Fraction of author pairs with prior co-authorship | 0.036 | 0.0000 |
| net_shared_coauthor_fraction | Co-authorship networ | Mean fraction of co-authors also on this paper | 0.813 | 0.0319 |
| net_clique_score | Co-authorship networ | Weighted co-authorship pair strength | 0.303 | 0.0206 |
| net_pair_novelty | Co-authorship networ | Fraction of author pairs appearing only on this pa | 0.964 | 0.0000 |
| geo_n_countries | Geographic | Number of author countries | 1.548 | 0.0000 |
| geo_is_international | Geographic | Binary: > 1 author country | 0.330 | 0.0000 |
| interaction_ai_x_tortured | Interaction | AI uniformity x tortured phrase count | 0.000 | 0.0000 |
| interaction_ai_x_template | Interaction | AI uniformity x abstract template score | 0.192 | 0.0239 |
| interaction_sim_x_boilerplate | Interaction | Similarity max x boilerplate density | 0.241 | 0.0000 |
| methods_sim_max | Methods similarity | Max methods-section cosine similarity (full text) | 0.000 | 0.0000 |
| methods_sim_mean | Methods similarity | Mean methods-section cosine similarity (full text) | 0.000 | 0.0000 |
| methods_sim_n_high | Methods similarity | Papers with methods similarity > 0.85 | 0.000 | 0.0000 |
| methods_in_cluster | Methods similarity | Paper is in a methods-similarity cluster | 0.000 | 0.0000 |

# Supplementary Table 3. Journal Risk Profiles

Top 30 journals by mean classifier probability (minimum 5 unlabelled papers).

| Journal | Papers | Mean prob | Flagged % | Retractions |
| --- | --- | --- | --- | --- |
| Procedia Computer Science | 8 | 0.631 | 75.0% | 0 |
| Electronics | 9 | 0.525 | 55.6% | 0 |
| IEEE Transactions on Neural Networks and Lear | 6 | 0.460 | 50.0% | 0 |
| JAMA | 5 | 0.456 | 40.0% | 0 |
| IEEE Access | 52 | 0.448 | 40.4% | 0 |
| Radiology | 15 | 0.447 | 40.0% | 0 |
| Diagnostics | 6 | 0.402 | 33.3% | 1 |
| Scientific Data | 8 | 0.393 | 25.0% | 0 |
| Journal of Medical Internet Research | 10 | 0.348 | 30.0% | 0 |
| The Lancet Digital Health | 11 | 0.333 | 36.4% | 0 |
| Scientific Reports | 69 | 0.297 | 20.3% | 4 |
| Complex & Intelligent Systems | 5 | 0.294 | 40.0% | 0 |
| PLoS ONE | 18 | 0.290 | 22.2% | 14 |
| Sensors | 20 | 0.274 | 25.0% | 0 |
| Journal of Innovation Information Technology | 5 | 0.269 | 20.0% | 0 |
| IEEE Journal of Biomedical and Health Informa | 10 | 0.269 | 20.0% | 0 |
| Medical Physics | 6 | 0.266 | 16.7% | 0 |
| medRxiv | 19 | 0.256 | 15.8% | 0 |
| IEEE Transactions on Medical Imaging | 25 | 0.249 | 8.0% | 0 |
| Applied Sciences | 13 | 0.245 | 23.1% | 0 |
| npj Digital Medicine | 20 | 0.242 | 15.0% | 0 |
| Cureus | 8 | 0.238 | 12.5% | 2 |
| Nature Machine Intelligence | 7 | 0.220 | 14.3% | 0 |
| International Journal of Computational and Ex | 5 | 0.178 | 20.0% | 0 |
| Bioengineering | 8 | 0.174 | 12.5% | 0 |
| BMC Medical Informatics and Decision Making | 8 | 0.173 | 0.0% | 0 |
| BMJ | 6 | 0.173 | 0.0% | 0 |
| Nature Methods | 6 | 0.153 | 0.0% | 0 |
| Nucleic Acids Research | 12 | 0.137 | 0.0% | 0 |
| Nature Communications | 28 | 0.124 | 3.6% | 0 |

# Supplementary Table 4. Unsupervised Scoring Weights

Frozen on 2026-04-09, prior to classifier training. See OSF pre-registration (DOI: 10.17605/OSF.IO/JB4T6) Appendix A.

| Tier | Feature | Weight | Rationale |
| --- | --- | --- | --- |
| 1.0 | Tortured phrases (>0) | 0.2 | Near-pathognomonic (Cabanac et al. 2021) |
| 1.0 | Methods similarity (max) | 0.15 | Near-verbatim reuse across labs |
| 1.0 | Abstract similarity (max) | 0.1 | Batch production signal |
| 2.0 | Co-author density | 0.1 | Author pool signal (Xia et al. 2023) |
| 2.0 | Boilerplate density | 0.08 | Formulaic writing (Hyland 2008) |
| 2.0 | AI x structural interaction | 0.07 | Combined signal, disambiguates LLM-assisted from LLM-fabricated |
| 2.0 | Author reuse rate | 0.05 | Same names recurring across papers |
| 3.0 | AI sentence uniformity | 0.05 | Low specificity post-2023 |
| 3.0 | Vocabulary diversity (inverse) | 0.05 | Low specificity alone |
| 3.0 | Discourse marker density | 0.03 | Weak signal alone |
| 3.0 | Domestic-only flag | 0.02 | Very weak signal |
| nan | TOTAL MAXIMUM | 0.9 | nan |

# Supplementary Table 5. Sensitivity Analysis Summary

All four pre-registered sensitivity analyses.

| Analysis | Primary AP | Sensitivity AP | AP delta | Interpretation |
| --- | --- | --- | --- | --- |
| Corpus definition (strict vs broad) | 0.858 | 0.949 | +0.092 | Prevalence robust (delta 1.2 pp) |
| Geographic features (without vs with) | 0.858 | 0.919 | +0.061 | CAUTION: geography partly discriminative |
| Full-text features (without vs with) | 0.859 | 0.899 | +0.040 | Minor impact; abstract-only reliable |
| Threshold 0.3 | - | - | - | Flagged rate range |
| Threshold 0.5 | - | - | - | nan |
| Threshold 0.7 | - | - | - | nan |

# Supplementary Table 6. Author Pools Detected

20 author pools (groups of 3+ authors sharing 3+ co-authored papers in the corpus).

| Pool | Authors | Papers | Density | Retracted | Rate |
| --- | --- | --- | --- | --- | --- |
| 1 | 5 | 13 | 0.5 | 13 | 100% |
| 2 | 3 | 10 | 0.667 | 0 | 0% |
| 3 | 6 | 9 | 0.8 | 0 | 0% |
| 4 | 3 | 9 | 1.0 | 8 | 89% |
| 5 | 3 | 8 | 0.667 | 0 | 0% |
| 6 | 5 | 8 | 0.8 | 0 | 0% |
| 7 | 4 | 8 | 0.833 | 8 | 100% |
| 8 | 4 | 7 | 1.0 | 0 | 0% |
| 9 | 45 | 6 | 0.196 | 0 | 0% |
| 10 | 4 | 6 | 0.667 | 5 | 83% |
| 11 | 3 | 5 | 0.667 | 0 | 0% |
| 12 | 3 | 5 | 0.667 | 0 | 0% |
| 13 | 3 | 4 | 1.0 | 0 | 0% |
| 14 | 4 | 4 | 0.833 | 0 | 0% |
| 15 | 3 | 3 | 1.0 | 0 | 0% |
| 16 | 3 | 3 | 1.0 | 0 | 0% |
| 17 | 3 | 3 | 1.0 | 3 | 100% |
| 18 | 6 | 2 | 0.333 | 0 | 0% |
| 19 | 5 | 1 | 1.0 | 0 | 0% |
| 20 | 9 | 1 | 0.222 | 0 | 0% |

# Supplementary Table 7. Leave-Hindawi-out analysis

Post-hoc sensitivity analysis removing 729 Hindawi-journal papers (713 retracted). Classifier retrained with identical architecture and hyperparameters on the remaining 1,749 papers (129 retracted, 7.4% retraction rate).

| Metric | Value |
| --- | --- |
| Remaining papers | 1749 |
| Remaining retracted | 129 (7.4%) |
| Average Precision (AP) | 0.437 |
| AUC-ROC | 0.839 |
| PU label frequency (c) | 0.614 |
| PU-corrected prevalence | 15.5% (95% CI: 14.7–16.4%) |
| Primary AP (comparison) | 0.858 |

Top 10 features by importance (leave-Hindawi-out):

| Feature | Importance |
| --- | --- |
| vocabulary_diversity | 0.1255 |
| reference_count | 0.1106 |
| ai_vocabulary_diversity | 0.07 |
| sim_mean | 0.0595 |
| ai_long_word_ratio | 0.0556 |
| ai_avg_word_length | 0.0554 |
| author_count | 0.0473 |
| ai_hapax_ratio | 0.0433 |
| sim_max | 0.0433 |
| net_author_reuse_rate | 0.036 |
